# Supplementary material
Source: Springer Nature journal article supplement (https://www.springermedizin.de/resource/supplementary/13054_2011_541_MOESM2_ESM.pdf/9708750)

Ratio of Highest to Lowest Serum Creatinine from the Week Preceding Scan

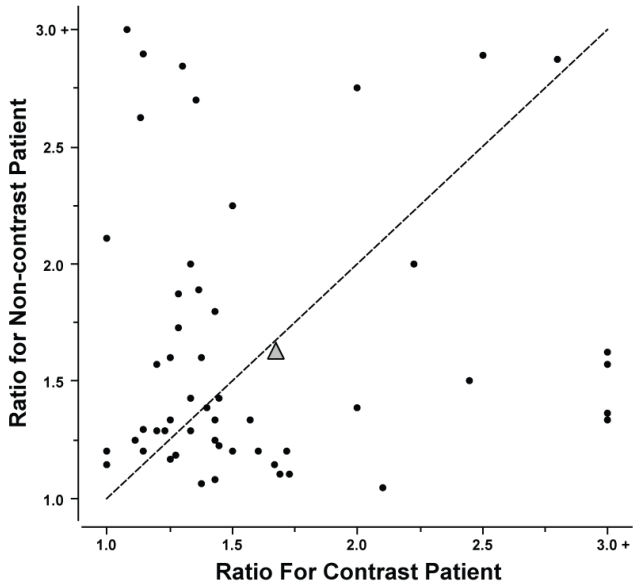

Ratio of Immediate Pre-Scan to Lowest Serum Creatinine from the Week Preceding Scan

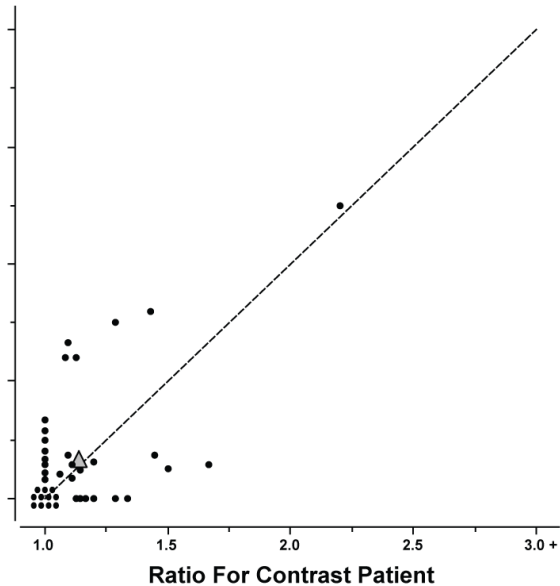

Supplement: MOESM2 [file 9708750]
